# Supplementary material for: Apoptotic exosome-like vesicles regulate endothelial gene expression, inflammatory signaling, and function through the NF-κB signaling pathway
Source: PubMed Central journal article supplement (PMC7387353; doi:10.1038/s41598-020-69548-0), 2020-07-28
Supplement: 41598_2020_69548_MOESM1_ESM.pdf [file 41598_2020_69548_MOESM1_ESM.pdf]

## Supplementary Materials for

### **Apoptotic exosome-like vesicles regulate endothelial gene expression, inflammatory signaling, and function through the NF- $\kappa$ B signaling pathway.**

Francis Migneault<sup>1,2,4</sup>, Mélanie Dieudé<sup>1,4</sup>, Julie Turgeon<sup>1,4</sup>, Déborah Beillevaire<sup>1,2,4</sup>, Marie-Pierre Hardy<sup>3,4</sup>, Alexandre Brodeur<sup>1</sup>, Nicolas Thibodeau<sup>1</sup>, Claude Perreault<sup>2,3,4</sup>, Marie-Josée Hébert<sup>1,2,4</sup>

1 Research Centre, Centre hospitalier de l'Université de Montréal (CRCHUM).

2 Université de Montréal

3 Institute for Research in Immunology and Cancer (IRIC).

4 Canadian Donation and Transplantation Research Program

\* Corresponding author:

Dr Marie-Josée Hébert, CRCHUM,

Tour Viger - R12.414, 900 rue St-Denis, H2X 0A9, Montréal (QC)

Tel:(514) 890-8000 Extension 25393, Fax: (514) 412-7661.

E-mail: marie-josée.hebert@umontreal.ca

## Supplementary Materials and Methods

*Flow cytometric analyses of EVs.* The following flow cytometric analyses originated from Dieudé *et al.* (13). Briefly, fluorescence was used as a trigger signal, and positive fluorescent events were plotted on an SSC/FSC-PMT graph. The ApoExo gate of detection was determined based on the acquisition of sky blue and yellow-green microspheres of sizes 90, 450, 840, 1000, and 3200 nm, and 1000 microspheres were acquired. Conditioned media were labeled for 30 min with V450 probe-conjugated annexin V (diluted 1:50; BD Biosciences) at room temperature in the dark. To process the data quantitatively, a known number of polystyrene microspheres (15- $\mu$ m diameter; Polysciences) were added to each tube.

*Electron microscopy.* The following electron microscopy procedures come from Dieudé *et al.* (13). The fraction enriched in apoptotic bodies was fixed in 2% glutaraldehyde-0.1M sodium cacodylate, post-fixed in 1% OsO<sub>4</sub>, dehydrated in alcohol, processed for flat embedding in Epon 812 and observed with a Zeiss CEM 902 electron microscope. Preparations of ApoExo were fixed in 4% paraformaldehyde in PBS buffer and were contrasted and embedded for whole-mount EM observation. Fixed ApoExo (5  $\mu$ L) were deposited on a Formvar/carbon-coated grid for 20 min and washed on drops of PBS at RT. The grid was then directly processed for negative staining by transferring it onto a drop of 1% glutaraldehyde for 5 min and washed on several drops of water. Contrasting was performed by transferring the grid onto a drop of 2% uranyl acetate-0.075 M oxalate pH7 solution for 5 min. Finally the grid was transferred onto a drop of 2% methyl cellulose-4 % uranyl acetate (9:1) solution for 10 min on ice and excess solution was blotted with Whatman filter paper and air-dried. Examination was performed with a Philips CM100 electron microscope.

*DNA extraction.* Isolated extracellular vesicles were resuspended in TRIzol Reagent and total RNA was extracted according to manufacturer instructions. Then, back extraction buffer (BEB) (4 M guanidine thiocyanate, 50 mM sodium citrate, 1 M Tris base) was added to the organic phase (500  $\mu$ L BEB per 1 mL of initial TRIzol Reagent) and the tube was gently mixed for 10 min following by centrifugation at 13 000 x g for 15 min at 4°C. The aqueous phase was collected and DNA was precipitated by adding isopropanol (400  $\mu$ L isopropanol per 1 mL of initial TRIzol Reagent) and washed once with 70% ethanol. The pellet was resuspended in deionized water. dsDNA was quantified using the Qubit dsDNA HS Assay Kit (ThermoFisher) according to manufacturer instructions.

**Table S1. List of the differentially expressed genes between endothelial cells exposed to ApoExo compared to vehicle-treated cells**

**Figure S1. Serum starvation increases caspase-3 activation and chromatin condensation in endothelial cells.** (A) Evaluation by Hoescht and Propidium iodide (HO/PI) staining of apoptotic or necrotic cells in endothelial cells exposed for 4 h to normal media or serum starvation. HO/PI experiments expressed as the percentage of apoptosis  $\pm$  SEM.  $n = 9$  for each condition. P value obtained by unpaired t-test. (B) Endothelial cells were exposed to normal media or serum starvation for 4 h and cleavage of caspase-3 was assessed. Cleaved caspase-3 was quantified by the cleaved caspase-3-to- $\beta$ -actin ratio and expressed as arbitrary units  $\pm$  SEM. Representative immunoblot of the cleavage of caspase 3 after 4 h of serum starvation is presented.  $n = 3$  for each condition. P value was obtained by unpaired t-test.

**Figure S2. Characterization of the apoptotic exosome-like exosome (ApoExo).** (A) Workflow for generation and isolation of ApoExo. (B) Flow cytometric quantifications of annexin V+ apoptotic bodies and ApoExo detected in the supernatant of conditioned endothelial cells  $\pm$  SEM.  $n = 12$  for each condition. (C) Total RNA quantification of apoptotic bodies and ApoExo detected in the supernatant of conditioned endothelial cells expressed as ng/mL of supernatant  $\pm$  SEM.  $n = 7$  for each condition. (D) Total protein quantification of apoptotic bodies and ApoExo detected in the supernatant of conditioned endothelial cells expressed as  $\mu$ g/mL of supernatant  $\pm$  SEM.  $n = 20$  for each condition. (E) Electron micrographs of apoptotic bodies and ApoExo released by serum-starved HUVECs and isolated by sequential ultracentrifugation. (F) Immunoblot analysis of different protein markers in ApoExo and apoptotic bodies from supernatant of conditioned endothelial cells.  $n \geq 3$  for each condition. Representative immunoblots are presented.

**Figure S3. Open wound areas are consistent between the experimental conditions.** Serum-starved endothelial cells were mechanically injured and exposed to the vehicle (Ctrl) or apoptotic exosome-like vesicles (ApoExo) (Scale bar: 200  $\mu$ m). Percentage of open wound areas at 0 h performed with TScratch software. Data are shown as % of the open wound area.  $n \geq 6$  for each condition. P values obtained by one-way ANOVA.

**Figure S4. Apoptotic exosome-like vesicles decrease several angiogenic parameters.** Serum-starved endothelial cells were exposed to the vehicle (Ctrl) or apoptotic exosome-like vesicles (ApoExo) and capillary-like structures were quantified following a 7 h treatment on extracellular matrix. Capillaries density is depicted as the number of nodes, junctions and segment length per field  $\pm$  SEM.  $n \geq 3$  for each condition. P values obtained by unpaired t-test.

**Figure S5. Modulation of endothelial functions and NF- $\kappa$ B activation are specific to apoptotic exosome-like vesicles (ApoExo).** (A) Serum-starved endothelial cells were mechanically injured and exposed to the vehicle (Ctrl), ApoExo, apoptotic bodies, exosomes (ExoN) isolated from the 200 000 x g centrifugation of conditioned media of non-apoptotic endothelial cells, ApoExo-depleted supernatant post-200 000 x g centrifugation or ApoExo treated with 0.05% Triton X-100. Wound closure was followed over a 12 h period. Wound healing assay expressed as the percentage of wound closure  $\pm$  SEM.  $n = 3$  for each condition. P values were obtained by one-way ANOVA and Bonferroni's *post hoc* test. (B) Serum-starved endothelial cells were exposed to the vehicle (Ctrl), ApoExo, apoptotic bodies or exosomes (ExoN) isolated from the 200 000 x g centrifugation of conditioned media of non-apoptotic endothelial cells and capillary-like structures were quantified following a 7 h treatment on extracellular matrix. Capillaries density is depicted as the number of segment per field  $\pm$  SEM.  $n = 3$  for each condition. P values obtained by one-way ANOVA and Bonferroni's *post hoc* test. (C) Serum-starved endothelial cells were exposed to the

vehicle (Ctrl), ApoExo, apoptotic bodies, exosomes (ExoN) isolated from the 200 000 x g centrifugation of conditioned media of non-apoptotic endothelial cells, ApoExo-depleted supernatant post-200 000 x g centrifugation or ApoExo treated with 0.05% Triton X-100 for 4 h and phosphorylation of NF- $\kappa$ B at Ser536 (p536-NF- $\kappa$ B) was assessed. NF- $\kappa$ B phosphorylation was quantified by the phospho-to-total ratio and expressed as arbitrary units  $\pm$  SEM. n = 3 for each condition. Representative immunoblots cropped from the same gel are presented. P values were obtained by one-way ANOVA and Bonferroni's *post hoc* test.

**Figure S6. Apoptotic exosome-like vesicles do not modulate the expression of mesenchymal markers in endothelial cells.** Apoptotic exosome-like vesicles do not induce the expression of  $\alpha$ -SMA or S100A4 in endothelial cells.  $\alpha$ -SMA and S100A4 expression by flow cytometry analysis of serum-starved endothelial cells exposed for 24 h to the vehicle (Ctrl) or apoptotic exosome-like vesicles (ApoExo). Flow cytometry experiments expressed as the percentage of vehicle-treated cells median fluorescence intensity (50,000 events/sample)  $\pm$  SEM (right). Representative gates of  $\alpha$ -SMA and S100A4 expression are depicted (left). n = 3 for each condition.

**Figure S7. NF- $\kappa$ B inhibition impaired pro-migratory phenotype induced by apoptotic exosome-like vesicles.** Serum-starved endothelial cells treated with vehicle or Celestrol (NF- $\kappa$ B inh.) were mechanically injured and exposed to the vehicle (Ctrl) or apoptotic exosome-like vesicles (ApoExo). Wound closure was followed over a 12 h period (Scale bar: 200  $\mu$ m). Wound healing assay expressed as the percentage of wound closure  $\pm$  SEM. n = 3 for each condition. Representative pictures and immunoblot of the inhibition of phosphorylation of NF- $\kappa$ B at Ser536 (pNF- $\kappa$ B) at 12 h post-injury are presented. P values were obtained by one-way ANOVA and Bonferroni's *post hoc* test.

**Figure S8. NF- $\kappa$ B inhibition restores angiogenic parameters decreased by apoptotic exosome-like vesicles in endothelial cells.** NF- $\kappa$ B knock-down restore tubules formation decreased by apoptotic exosome-like vesicles. Serum-starved endothelial cells transfected with Ctrl or NF- $\kappa$ B siRNA 90 nM were exposed to the vehicle (Ctrl) or apoptotic exosome-like vesicles (ApoExo) and capillary-like structures were quantified following a 7 h treatment on extracellular matrix. Capillaries density is depicted as the number of nodes, junctions and segment length per field  $\pm$  SEM. n = 4 for each condition. P values were obtained by one-way ANOVA and Bonferroni's *post hoc* test.

**Figure S9. Validation of RNA-seq data using RT-qPCR.** The expression of ICAM-1, VCAM-1, and E-Selectin using RNA-sequencing data and RT-qPCR analysis on serum-starved endothelial cells exposed to ApoExo was assessed. ApoExo did not modulate the expression of surface adhesion molecules compared to control both by RNA-sequencing analysis and RT-qPCR. n = 2 for each condition.

**Figure S10. Modulation of endothelial phenotype by apoptotic exosome-like vesicles (ApoExo) is proteasome-independent.** Serum-starved endothelial cells were mechanically injured and exposed to the vehicle (Ctrl) or ApoExo from endothelial cells treated with the proteasome inhibitor bortezomib or vehicle. Wound closure was followed over a 12 h period. Wound healing assay expressed as the percentage of wound closure  $\pm$  SEM. n = 3 for each condition. P values were obtained by one-way ANOVA and Bonferroni's *post hoc* test. CD31 expression by flow cytometry analysis of serum-starved endothelial cells exposed for 24 h to the vehicle (Ctrl) or ApoExo from endothelial cells treated with the proteasome inhibitor bortezomib or vehicle. Flow cytometry experiments expressed as the percentage of vehicle-treated cells

median fluorescence intensity (50,000 events/sample)  $\pm$  SEM (right). n = 3 for each condition. P values were obtained by one-way ANOVA and Bonferroni's *post hoc* test.

**Figure S11. Apoptotic exosome-like vesicles (ApoExo) are not enriched in double-strand DNA.** Double-strand DNA quantification of apoptotic bodies and ApoExo detected in the supernatant of conditioned endothelial cells expressed as pg/mL of supernatant  $\pm$  SEM. n = 2 for each condition.

**Figure S12. Source data, unedited gels from Figure 4.**

**Figure S13. Source data, unedited gels from Figure 5.**

**Figure S14. Source data, unedited gels from Figure S1.**

**Figure S15. Source data, unedited gels from Figure S2.**

**Figure S16. Source data, unedited gels from Figure S5.**



Table S1

| Gene.ID         | FPKM  |       |        |       | Gene           | log2FC | log2FC.2 | log2FC mean | Gene type |
|-----------------|-------|-------|--------|-------|----------------|--------|----------|-------------|-----------|
|                 | SS.2  | SS    | Nano.2 | Nano  |                |        |          |             |           |
| ENSG00000224043 | 1,19  | 2,70  | 0,72   | 1,47  | CCNT2-AS1      | -0,88  | -0,72    | -0,80       | antisense |
| ENSG00000224063 | 0,72  | 0,18  | 1,35   | 1,65  | AC007319.1     | 3,19   | 0,91     | 2,05        | antisense |
| ENSG00000227751 | 0,31  | 0,71  | 1,61   | 3,00  | RP1-20B21.4    | 2,08   | 2,37     | 2,23        | antisense |
| ENSG00000254911 | 2,35  | 0,58  | 4,56   | 1,75  | SCARNA9        | 1,59   | 0,96     | 1,27        | antisense |
| ENSG00000262533 | 0,37  | 0,44  | 1,15   | 1,67  | RP11-667K14.4  | 1,92   | 1,63     | 1,78        | antisense |
| ENSG00000266341 | 0,88  | 0,00  | 2,22   | 2,24  | RP5-890E16.4   | 11,13  | 1,33     | 6,23        | antisense |
| ENSG00000175772 | 0,70  | 0,86  | 1,07   | 1,53  | LINC01106      | 0,83   | 0,61     | 0,72        | lincRNA   |
| ENSG00000205663 | 0,85  | 0,64  | 1,39   | 1,51  | RP11-706O15.5  | 1,24   | 0,71     | 0,97        | lincRNA   |
| ENSG00000226007 | 0,30  | 0,41  | 1,17   | 1,10  | RP11-211N8.2   | 1,42   | 1,96     | 1,69        | lincRNA   |
| ENSG00000236914 | 1,58  | 1,54  | 0,93   | 0,71  | RP11-1008C21.2 | -1,12  | -0,76    | -0,94       | lincRNA   |
| ENSG00000258610 | 2,26  | 1,16  | 0,00   | 0,00  | RP11-488C13.7  | -10,18 | -11,14   | -10,66      | lincRNA   |
| ENSG00000260923 | 3,24  | 4,07  | 1,46   | 2,59  | AC137934.1     | -0,65  | -1,15    | -0,90       | lincRNA   |
| ENSG00000263394 | 2,00  | 1,41  | 1,15   | 0,90  | RP11-160E2.19  | -0,65  | -0,80    | -0,72       | lincRNA   |
| ENSG00000270103 | 4,46  | 2,59  | 9,94   | 4,41  | RNU11          | 0,77   | 1,16     | 0,96        | lincRNA   |
| ENSG00000271737 | 1,04  | 1,34  | 0,50   | 0,73  | CTB-113I20.2   | -0,88  | -1,06    | -0,97       | lincRNA   |
| ENSG00000274818 | 0,91  | 0,59  | 1,91   | 1,29  | RP1-292L20.3   | 1,13   | 1,07     | 1,10        | lincRNA   |
| ENSG00000275496 | 7,88  | 13,16 | 3,17   | 7,33  | CH507-24F1.2   | -0,84  | -1,31    | -1,08       | lincRNA   |
| ENSG00000199133 | 4,05  | 5,65  | 0,00   | 2,14  | MIRLET7D       | -1,40  | -11,98   | -6,69       | miRNA     |
| ENSG00000207548 | 0,00  | 0,00  | 4,90   | 1,74  | MIR217         | 10,77  | 12,26    | 11,51       | miRNA     |
| ENSG00000264248 | 1,80  | 0,00  | 3,00   | 1,26  | AL603831.1     | 10,30  | 0,74     | 5,52        | miRNA     |
| ENSG00000265238 | 18,79 | 3,01  | 0,00   | 0,00  | MIR3614        | -11,56 | -14,20   | -12,88      | miRNA     |
| ENSG00000266192 | 0,00  | 0,00  | 5,85   | 1,96  | MIR1260B       | 10,94  | 12,51    | 11,73       | miRNA     |
| ENSG00000273917 | 0,04  | 0,00  | 2,74   | 7,12  | AC126544.1     | 12,80  | 6,06     | 9,43        | miRNA     |
| ENSG00000275668 | 2,91  | 0,00  | 9,70   | 1,68  | MIR29C         | 10,72  | 1,74     | 6,23        | miRNA     |
| ENSG00000276078 | 10,37 | 11,48 | 0,00   | 3,90  | AC091154.1     | -1,56  | -13,34   | -7,45       | miRNA     |
| ENSG00000278371 | 3,66  | 2,20  | 2,04   | 0,96  | AL442127.1     | -1,20  | -0,84    | -1,02       | miRNA     |
| ENSG00000280605 | 0,00  | 0,00  | 3,71   | 2,90  | AP001107.1     | 11,50  | 11,86    | 11,68       | miRNA     |
| ENSG00000280849 | 0,00  | 0,00  | 4,70   | 1,69  | AC005339.1     | 10,72  | 12,20    | 11,46       | miRNA     |
| ENSG00000280874 | 0,56  | 0,00  | 2,52   | 1,82  | AC239868.2     | 10,83  | 2,17     | 6,50        | miRNA     |
| ENSG00000281134 | 0,56  | 0,00  | 2,52   | 1,82  | AC239868.3     | 10,83  | 2,17     | 6,50        | miRNA     |
| ENSG00000200391 | 2,81  | 4,28  | 0,00   | 0,00  | Y_RNA          | -12,06 | -11,46   | -11,76      | misc_RNA  |
| ENSG00000273541 | 1,58  | 0,55  | 3,28   | 2,09  | DLEU1_2        | 1,92   | 1,05     | 1,49        | misc_RNA  |
| ENSG00000273961 | 0,00  | 4,90  | 6,96   | 8,99  | HOXA11-AS1_1   | 0,88   | 12,77    | 6,82        | misc_RNA  |
| ENSG00000274396 | 18,28 | 30,34 | 12,03  | 15,40 | HOTAIRM1_4     | -0,98  | -0,60    | -0,79       | misc_RNA  |

|                 |       |       |       |       |               |       |        |       |                      |
|-----------------|-------|-------|-------|-------|---------------|-------|--------|-------|----------------------|
| ENSG00000274845 | 0,00  | 0,00  | 1,71  | 1,53  | uc_338        | 10,58 | 10,74  | 10,66 | misc_RNA             |
| ENSG00000275134 | 1,44  | 0,00  | 3,11  | 3,08  | MEG8_2        | 11,59 | 1,11   | 6,35  | misc_RNA             |
| ENSG00000281789 | 0,00  | 0,00  | 11,72 | 6,09  | Y_RNA         | 12,57 | 13,52  | 13,04 | misc_RNA             |
| ENSG00000178715 | 0,83  | 2,84  | 2,52  | 4,88  | RP11-169K16.8 | 0,78  | 1,60   | 1,19  | processed_pseudogene |
| ENSG00000183586 | 0,86  | 2,73  | 2,19  | 5,31  | HMGN3P1       | 0,96  | 1,35   | 1,15  | processed_pseudogene |
| ENSG00000214857 | 1,43  | 4,58  | 0,60  | 1,54  | SHFM1P1       | -1,57 | -1,25  | -1,41 | processed_pseudogene |
| ENSG00000223723 | 0,73  | 0,72  | 1,15  | 1,37  | BX842568.2    | 0,93  | 0,65   | 0,79  | processed_pseudogene |
| ENSG00000224365 | 16,65 | 9,02  | 28,31 | 19,27 | RP11-252P18.1 | 1,10  | 0,77   | 0,93  | processed_pseudogene |
| ENSG00000225486 | 0,99  | 0,86  | 1,73  | 2,02  | RP11-301G21.1 | 1,23  | 0,80   | 1,02  | processed_pseudogene |
| ENSG00000228399 | 2,08  | 2,10  | 3,63  | 8,87  | RP4-575N6.2   | 2,08  | 0,80   | 1,44  | processed_pseudogene |
| ENSG00000229023 | 0,65  | 0,78  | 1,36  | 2,33  | AC067945.3    | 1,58  | 1,06   | 1,32  | processed_pseudogene |
| ENSG00000229230 | 1,64  | 4,47  | 0,00  | 2,25  | MT1P3         | -0,99 | -10,68 | -5,84 | processed_pseudogene |
| ENSG00000231702 | 2,51  | 1,61  | 0,00  | 0,73  | RP11-54O7.10  | -1,14 | -11,29 | -6,22 | processed_pseudogene |
| ENSG00000232727 | 1,55  | 1,86  | 2,44  | 3,88  | YWHAEP1       | 1,06  | 0,65   | 0,86  | processed_pseudogene |
| ENSG00000233205 | 1,06  | 0,71  | 1,84  | 1,11  | AC108479.2    | 0,64  | 0,80   | 0,72  | processed_pseudogene |
| ENSG00000235028 | 1,19  | 2,35  | 1,82  | 4,29  | HMGN1P30      | 0,87  | 0,61   | 0,74  | processed_pseudogene |
| ENSG00000235043 | 5,06  | 4,04  | 8,11  | 6,07  | TECRP1        | 0,59  | 0,68   | 0,63  | processed_pseudogene |
| ENSG00000235211 | 0,00  | 0,00  | 4,97  | 1,10  | TMSB10P2      | 10,10 | 12,28  | 11,19 | processed_pseudogene |
| ENSG00000235378 | 0,00  | 11,75 | 14,97 | 21,26 | MRPS10P1      | 0,86  | 13,87  | 7,36  | processed_pseudogene |
| ENSG00000235579 | 0,41  | 0,00  | 1,39  | 1,27  | AC007283.4    | 10,31 | 1,76   | 6,04  | processed_pseudogene |
| ENSG00000236281 | 2,17  | 1,86  | 1,32  | 1,18  | AC093106.5    | -0,66 | -0,72  | -0,69 | processed_pseudogene |
| ENSG00000236312 | 1,87  | 4,13  | 3,71  | 6,70  | RPL34P34      | 0,70  | 0,99   | 0,84  | processed_pseudogene |
| ENSG00000237701 | 0,29  | 1,00  | 1,26  | 1,95  | ATP5JP1       | 0,96  | 2,12   | 1,54  | processed_pseudogene |
| ENSG00000240616 | 1,20  | 5,02  | 2,13  | 8,39  | RPS6P25       | 0,74  | 0,83   | 0,78  | processed_pseudogene |
| ENSG00000241464 | 1,64  | 3,27  | 0,00  | 1,32  | RPL39P38      | -1,31 | -10,68 | -5,99 | processed_pseudogene |
| ENSG00000242634 | 0,52  | 1,22  | 1,47  | 3,18  | RPS24P16      | 1,38  | 1,50   | 1,44  | processed_pseudogene |
| ENSG00000248794 | 0,61  | 0,51  | 1,15  | 1,22  | CTD-2248H3.1  | 1,26  | 0,91   | 1,09  | processed_pseudogene |
| ENSG00000249986 | 0,80  | 2,21  | 1,67  | 4,09  | YWHAQP6       | 0,89  | 1,06   | 0,97  | processed_pseudogene |
| ENSG00000250202 | 0,93  | 1,19  | 1,60  | 2,05  | RP11-397E7.2  | 0,78  | 0,78   | 0,78  | processed_pseudogene |
| ENSG00000256148 | 0,00  | 0,00  | 1,17  | 1,92  | RP11-809N8.5  | 10,91 | 10,19  | 10,55 | processed_pseudogene |
| ENSG00000261588 | 0,00  | 1,97  | 1,51  | 3,81  | AC002310.17   | 0,95  | 10,56  | 5,76  | processed_pseudogene |
| ENSG00000267340 | 0,00  | 0,00  | 1,37  | 1,27  | RP11-242D8.3  | 10,31 | 10,42  | 10,37 | processed_pseudogene |
| ENSG00000223745 | 0,87  | 1,31  | 2,13  | 2,07  | RP4-717I23.3  | 0,66  | 1,29   | 0,98  | processed_transcript |
| ENSG00000259244 | 1,32  | 0,82  | 2,77  | 1,90  | RP11-182J1.12 | 1,21  | 1,07   | 1,14  | processed_transcript |
| ENSG00000273184 | 2,50  | 2,25  | 5,50  | 3,88  | RP11-212P7.3  | 0,79  | 1,14   | 0,96  | processed_transcript |
| ENSG00000073331 | 1,57  | 0,74  | 3,07  | 1,32  | ALPK1         | 0,83  | 0,97   | 0,90  | protein_coding       |
| ENSG00000101695 | 0,90  | 0,49  | 1,47  | 1,35  | RNF125        | 1,46  | 0,71   | 1,08  | protein_coding       |

|                 |       |       |       |       |                |        |        |        |                   |
|-----------------|-------|-------|-------|-------|----------------|--------|--------|--------|-------------------|
| ENSG00000107821 | 0,62  | 0,50  | 1,01  | 1,05  | KAZALD1        | 1,07   | 0,70   | 0,89   | protein_coding    |
| ENSG00000110057 | 3,85  | 4,40  | 2,42  | 2,62  | UNC93B1        | -0,75  | -0,67  | -0,71  | protein_coding    |
| ENSG00000162878 | 1,08  | 0,66  | 1,69  | 1,11  | PKDCC          | 0,75   | 0,65   | 0,70   | protein_coding    |
| ENSG00000168685 | 1,11  | 2,57  | 0,47  | 1,58  | IL7R           | -0,70  | -1,24  | -0,97  | protein_coding    |
| ENSG00000172058 | 9,77  | 5,51  | 5,05  | 3,08  | SERF1A         | -0,84  | -0,95  | -0,90  | protein_coding    |
| ENSG00000184719 | 3,00  | 2,53  | 1,97  | 1,45  | RNLS           | -0,80  | -0,61  | -0,70  | protein_coding    |
| ENSG00000185019 | 1,47  | 1,46  | 2,22  | 2,33  | UBOX5          | 0,67   | 0,59   | 0,63   | protein_coding    |
| ENSG00000185513 | 0,81  | 0,67  | 1,39  | 1,03  | L3MBTL1        | 0,62   | 0,78   | 0,70   | protein_coding    |
| ENSG00000196754 | 1,99  | 3,29  | 1,32  | 2,12  | S100A2         | -0,63  | -0,59  | -0,61  | protein_coding    |
| ENSG00000197779 | 1,08  | 0,95  | 1,75  | 1,50  | ZNF81          | 0,66   | 0,70   | 0,68   | protein_coding    |
| ENSG00000198064 | 0,71  | 0,50  | 1,63  | 1,12  | RP11-347C12.1  | 1,16   | 1,20   | 1,18   | protein_coding    |
| ENSG00000235194 | 1,88  | 1,22  | 2,87  | 2,37  | PPP1R3E        | 0,96   | 0,61   | 0,78   | protein_coding    |
| ENSG00000240891 | 3,14  | 2,28  | 1,97  | 1,41  | PLCXD2         | -0,69  | -0,67  | -0,68  | protein_coding    |
| ENSG00000243414 | 1,97  | 1,18  | 0,99  | 0,68  | TICAM2         | -0,79  | -0,99  | -0,89  | protein_coding    |
| ENSG00000256977 | 8,04  | 2,08  | 4,80  | 0,00  | LIMS3          | -11,02 | -0,74  | -5,88  | protein_coding    |
| ENSG00000259316 | 12,82 | 1,75  | 20,99 | 3,93  | CTD-2116N17.1  | 1,17   | 0,71   | 0,94   | protein_coding    |
| ENSG00000259332 | 1,71  | 3,49  | 0,43  | 1,65  | ST20-MTHFS     | -1,08  | -1,99  | -1,53  | protein_coding    |
| ENSG00000260537 | 3,68  | 1,41  | 2,06  | 0,00  | RP11-529K1.3   | -10,46 | -0,84  | -5,65  | protein_coding    |
| ENSG00000267740 | 2,09  | 1,51  | 1,39  | 0,66  | AC024592.12    | -1,19  | -0,59  | -0,89  | protein_coding    |
| ENSG00000267952 | 3,49  | 6,91  | 7,63  | 11,13 | CTD-2207O23.12 | 0,69   | 1,13   | 0,91   | protein_coding    |
| ENSG00000270149 | 1,35  | 1,42  | 2,40  | 4,47  | RP11-544M22.13 | 1,65   | 0,83   | 1,24   | protein_coding    |
| ENSG00000272196 | 1,67  | 0,00  | 2,70  | 5,51  | HIST2H2AA4     | 12,43  | 0,69   | 6,56   | protein_coding    |
| ENSG00000279274 | 0,58  | 0,79  | 1,18  | 2,06  | AC012005.3     | 1,38   | 1,02   | 1,20   | protein_coding    |
| ENSG00000279473 | 0,66  | 1,25  | 1,17  | 2,85  | AC009065.4     | 1,19   | 0,83   | 1,01   | protein_coding    |
| ENSG00000280755 | 0,00  | 0,23  | 1,44  | 1,58  | AC009950.1     | 2,77   | 10,49  | 6,63   | protein_coding    |
| ENSG00000249784 | 23,37 | 18,08 | 6,00  | 10,05 | SCARNA22       | -0,85  | -1,96  | -1,40  | scaRNA            |
| ENSG00000252481 | 0,97  | 0,44  | 2,01  | 1,15  | SCARNA13       | 1,38   | 1,05   | 1,22   | scaRNA            |
| ENSG00000242590 | 5,98  | 5,84  | 9,06  | 9,61  | RP11-5407.14   | 0,72   | 0,60   | 0,66   | sense_intronic    |
| ENSG00000250135 | 0,83  | 1,02  | 1,51  | 3,06  | RP4-622L5.2    | 1,58   | 0,86   | 1,22   | sense_intronic    |
| ENSG00000261783 | 1,24  | 1,05  | 0,59  | 0,57  | RP11-252K23.2  | -0,88  | -1,07  | -0,98  | sense_intronic    |
| ENSG00000269925 | 1,04  | 0,49  | 1,65  | 1,85  | RP3-467L1.6    | 1,91   | 0,67   | 1,29   | sense_intronic    |
| ENSG00000269970 | 0,93  | 0,00  | 1,58  | 1,02  | RP11-498E2.9   | 10,00  | 0,76   | 5,38   | sense_intronic    |
| ENSG00000271452 | 0,40  | 0,57  | 1,00  | 1,77  | RP11-342K6.2   | 1,63   | 1,32   | 1,48   | sense_intronic    |
| ENSG00000243960 | 4,19  | 7,91  | 1,55  | 3,90  | RP11-552M11.4  | -1,02  | -1,43  | -1,23  | sense_overlapping |
| ENSG00000250917 | 0,40  | 0,76  | 1,13  | 1,37  | RP4-785G19.5   | 0,85   | 1,50   | 1,17   | sense_overlapping |
| ENSG00000206621 | 0,00  | 0,00  | 14,14 | 6,87  | SNORD116-14    | 12,75  | 13,79  | 13,27  | snoRNA            |
| ENSG00000206634 | 1,36  | 2,41  | 0,00  | 0,00  | SNORA22        | -11,24 | -10,41 | -10,82 | snoRNA            |

|                 |       |       |       |       |               |        |        |        |                                    |
|-----------------|-------|-------|-------|-------|---------------|--------|--------|--------|------------------------------------|
| ENSG00000207063 | 21,07 | 8,55  | 0,00  | 3,04  | SNORD116-1    | -1,49  | -14,36 | -7,93  | snoRNA                             |
| ENSG00000207067 | 1,44  | 0,00  | 4,82  | 1,08  | SNORA72       | 10,08  | 1,74   | 5,91   | snoRNA                             |
| ENSG00000207279 | 8,49  | 19,72 | 0,00  | 6,87  | SNORD116-24   | -1,52  | -13,05 | -7,29  | snoRNA                             |
| ENSG00000207375 | 0,00  | 0,00  | 14,14 | 3,43  | SNORD116-23   | 11,74  | 13,79  | 12,77  | snoRNA                             |
| ENSG00000207445 | 3,99  | 0,00  | 6,68  | 2,50  | SNORD15B      | 11,29  | 0,74   | 6,02   | snoRNA                             |
| ENSG00000208892 | 1,29  | 2,30  | 0,00  | 0,00  | SNORA49       | -11,17 | -10,33 | -10,75 | snoRNA                             |
| ENSG00000212283 | 29,68 | 33,15 | 4,50  | 18,14 | SNORD89       | -0,87  | -2,72  | -1,80  | snoRNA                             |
| ENSG00000221164 | 3,26  | 2,79  | 13,62 | 10,58 | SNORA11       | 1,92   | 2,06   | 1,99   | snoRNA                             |
| ENSG00000221491 | 1,25  | 2,25  | 0,00  | 0,00  | SNORA34       | -11,14 | -10,29 | -10,71 | snoRNA                             |
| ENSG00000222489 | 1,91  | 1,79  | 0,00  | 0,00  | SNORA79       | -10,81 | -10,90 | -10,85 | snoRNA                             |
| ENSG00000238832 | 0,00  | 0,00  | 1,71  | 2,54  | snoU109       | 11,31  | 10,74  | 11,03  | snoRNA                             |
| ENSG00000239039 | 29,78 | 23,47 | 7,11  | 0,00  | SNORD13       | -14,52 | -2,07  | -8,29  | snoRNA                             |
| ENSG00000254341 | 0,61  | 0,00  | 10,03 | 8,46  | SNORD87       | 13,05  | 4,04   | 8,54   | snoRNA                             |
| ENSG00000272034 | 0,00  | 0,00  | 15,09 | 3,58  | SNORD14A      | 11,81  | 13,88  | 12,84  | snoRNA                             |
| ENSG00000275146 | 0,00  | 0,00  | 31,01 | 11,31 | snoU2_19      | 13,47  | 14,92  | 14,19  | snoRNA                             |
| ENSG00000199347 | 44,93 | 31,13 | 28,57 | 16,96 | RNU5E-1       | -0,88  | -0,65  | -0,76  | snRNA                              |
| ENSG00000199568 | 17,43 | 14,60 | 74,82 | 25,41 | RNU5A-1       | 0,80   | 2,10   | 1,45   | snRNA                              |
| ENSG00000200156 | 14,94 | 4,87  | 29,10 | 15,24 | RNU5B-1       | 1,65   | 0,96   | 1,30   | snRNA                              |
| ENSG00000200469 | 4,00  | 5,73  | 0,00  | 0,00  | RNU6-112P     | -12,48 | -11,97 | -12,23 | snRNA                              |
| ENSG00000252311 | 0,00  | 0,00  | 3,00  | 1,26  | RNU1-103P     | 10,30  | 11,55  | 10,93  | snRNA                              |
| ENSG00000280320 | 0,48  | 1,12  | 1,68  | 3,00  | RP11-629N8.5  | 1,42   | 1,81   | 1,61   | TEC                                |
| ENSG00000227682 | 2,04  | 4,56  | 3,11  | 8,57  | ATP5A1P2      | 0,91   | 0,61   | 0,76   | transcribed_processed_pseudogene   |
| ENSG00000241434 | 1,61  | 1,52  | 0,00  | 0,62  | CTD-2224J9.4  | -1,29  | -10,65 | -5,97  | transcribed_processed_pseudogene   |
| ENSG00000259516 | 1,05  | 1,43  | 1,73  | 2,41  | ANP32AP1      | 0,75   | 0,72   | 0,74   | transcribed_processed_pseudogene   |
| ENSG00000274026 | 2,09  | 1,58  | 0,77  | 0,74  | FAM27E3       | -1,09  | -1,44  | -1,27  | transcribed_processed_pseudogene   |
| ENSG00000189136 | 3,43  | 3,86  | 2,22  | 2,22  | UBE2Q2P1      | -0,80  | -0,63  | -0,71  | transcribed_unprocessed_pseudogene |
| ENSG00000205918 | 0,20  | 0,54  | 1,31  | 1,05  | PDPK2P        | 0,96   | 2,71   | 1,83   | transcribed_unprocessed_pseudogene |
| ENSG00000228782 | 2,60  | 3,09  | 4,14  | 4,75  | CTD-2026D20.3 | 0,62   | 0,67   | 0,65   | transcribed_unprocessed_pseudogene |
| ENSG00000243406 | 1,59  | 1,73  | 0,88  | 1,10  | MRPS31P5      | -0,65  | -0,85  | -0,75  | transcribed_unprocessed_pseudogene |
| ENSG00000196302 | 1,38  | 1,48  | 0,00  | 0,53  | RP11-497H16.5 | -1,48  | -10,43 | -5,96  | unprocessed_pseudogene             |
| ENSG00000248126 | 2,31  | 5,94  | 15,43 | 14,07 | CTD-2012J19.2 | 1,24   | 2,74   | 1,99   | unprocessed_pseudogene             |

|                |     | %  |
|----------------|-----|----|
| protein_coding | 27  | 19 |
| pseudogene     | 39  | 28 |
| lincRNA/lncRNA | 23  | 17 |
| antisense      | 6   | 4  |
| snRNA          | 24  | 17 |
| misc_RNA       | 7   | 5  |
| miRNA          | 13  | 9  |
|                | 139 |    |

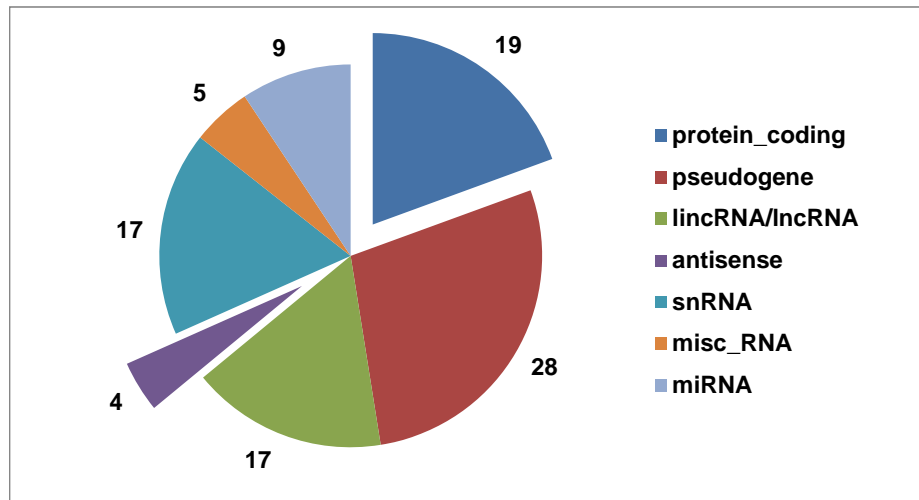

**A**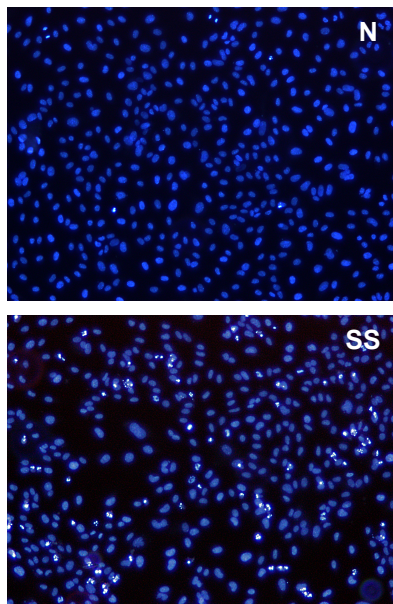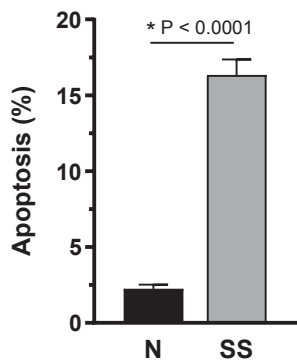**B**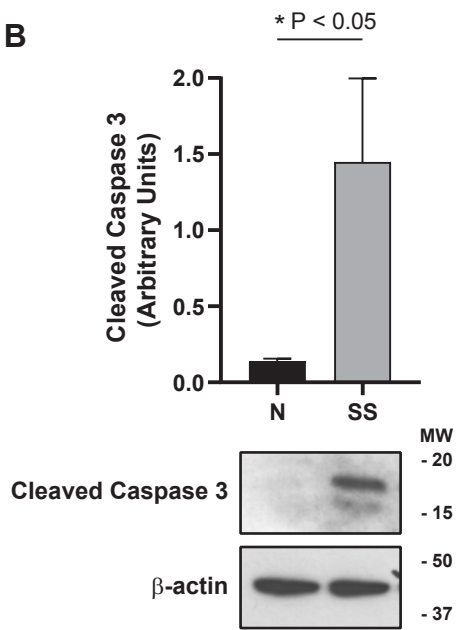

**A**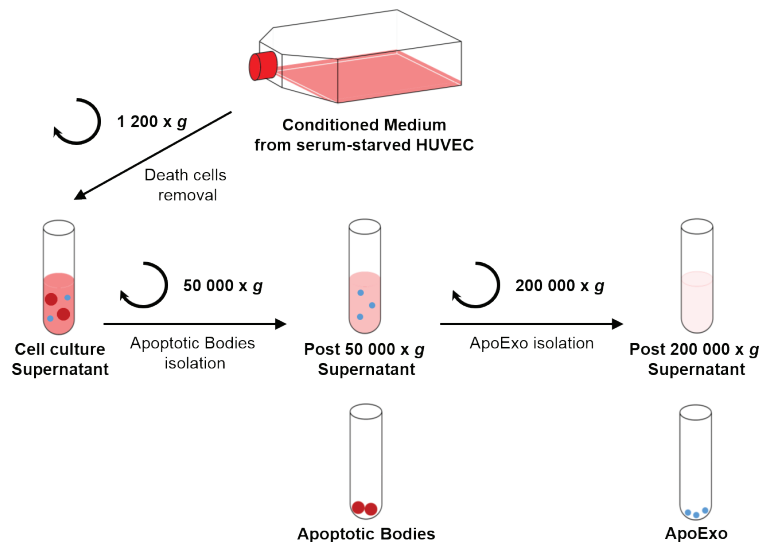**B**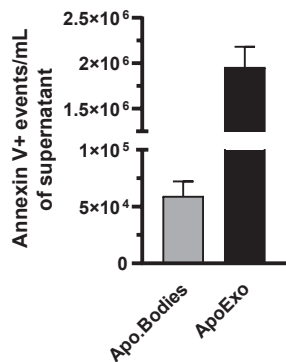**C**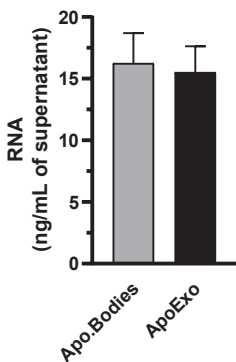**D**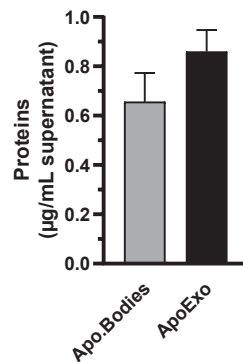**E**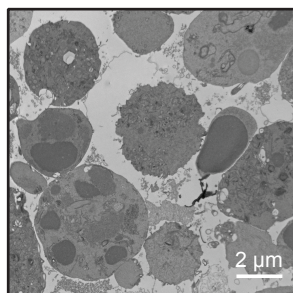

Apo.Bodies

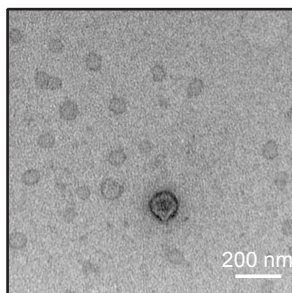

ApoExo

**F**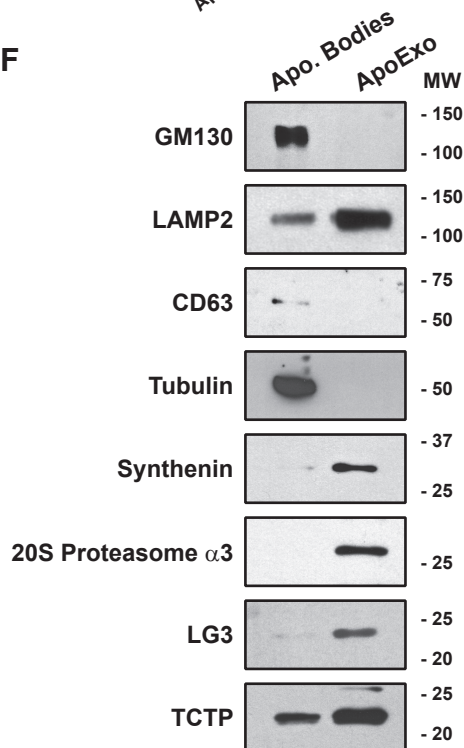

Figure S2

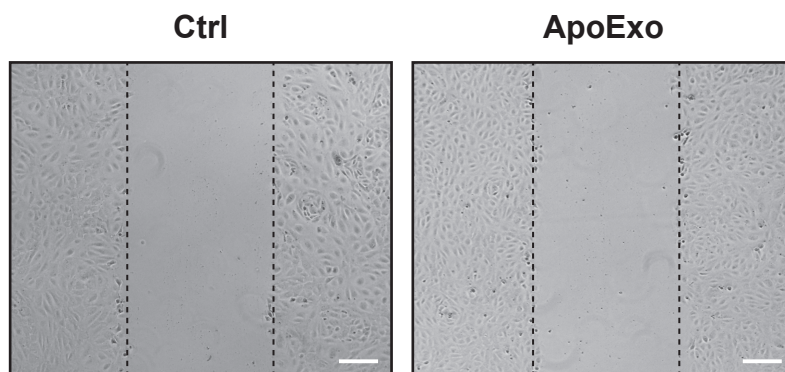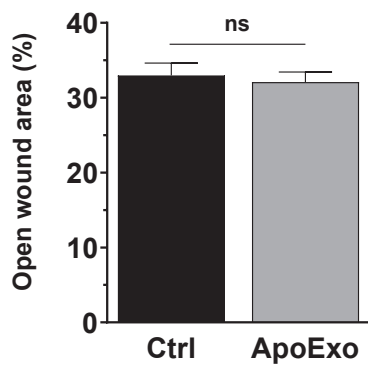

Figure S3



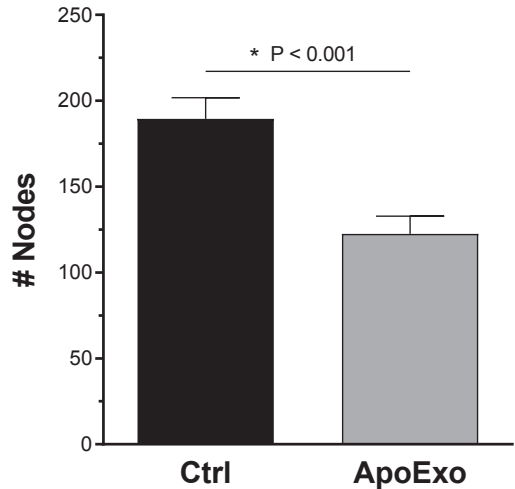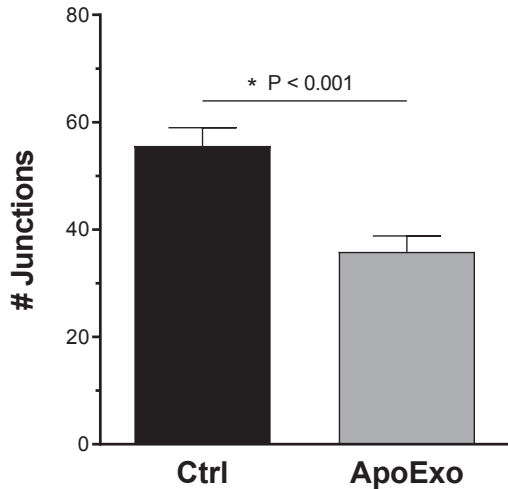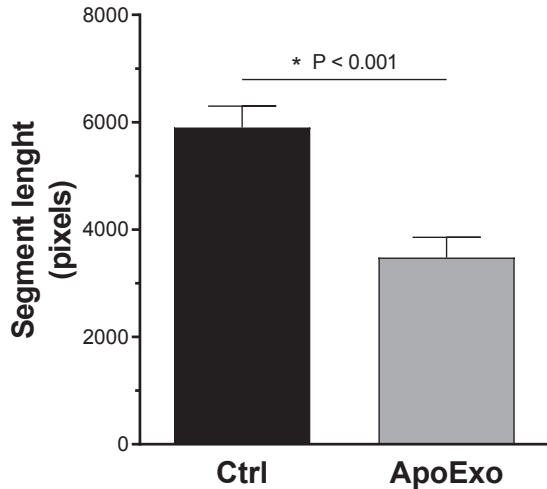

Figure S4

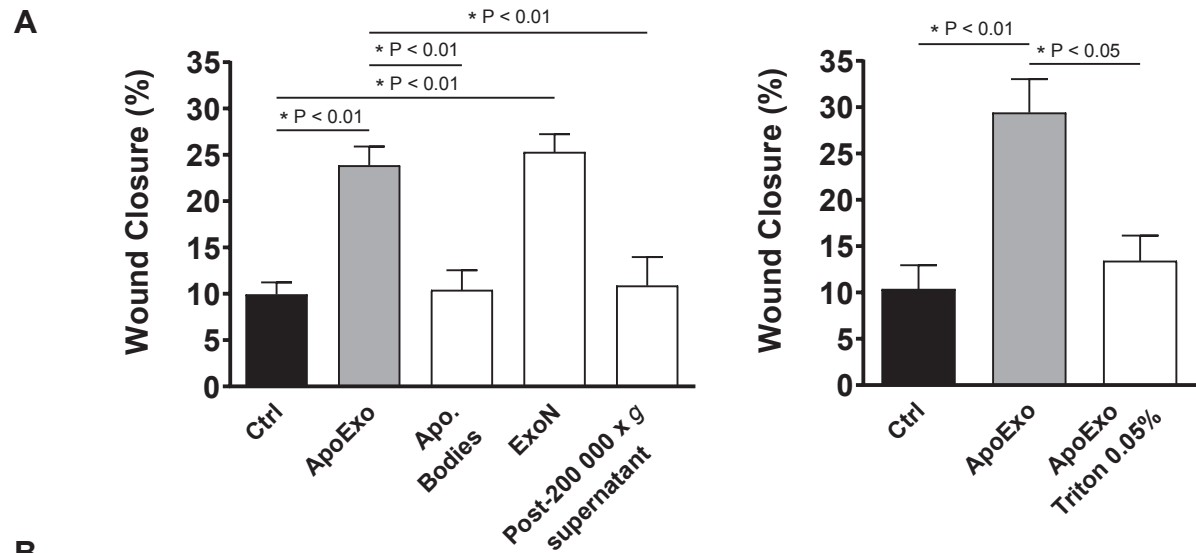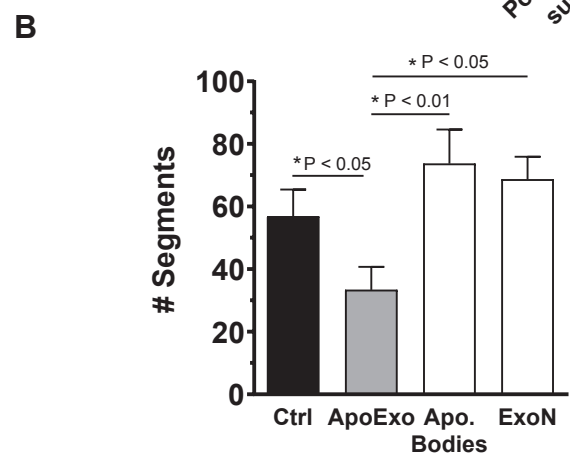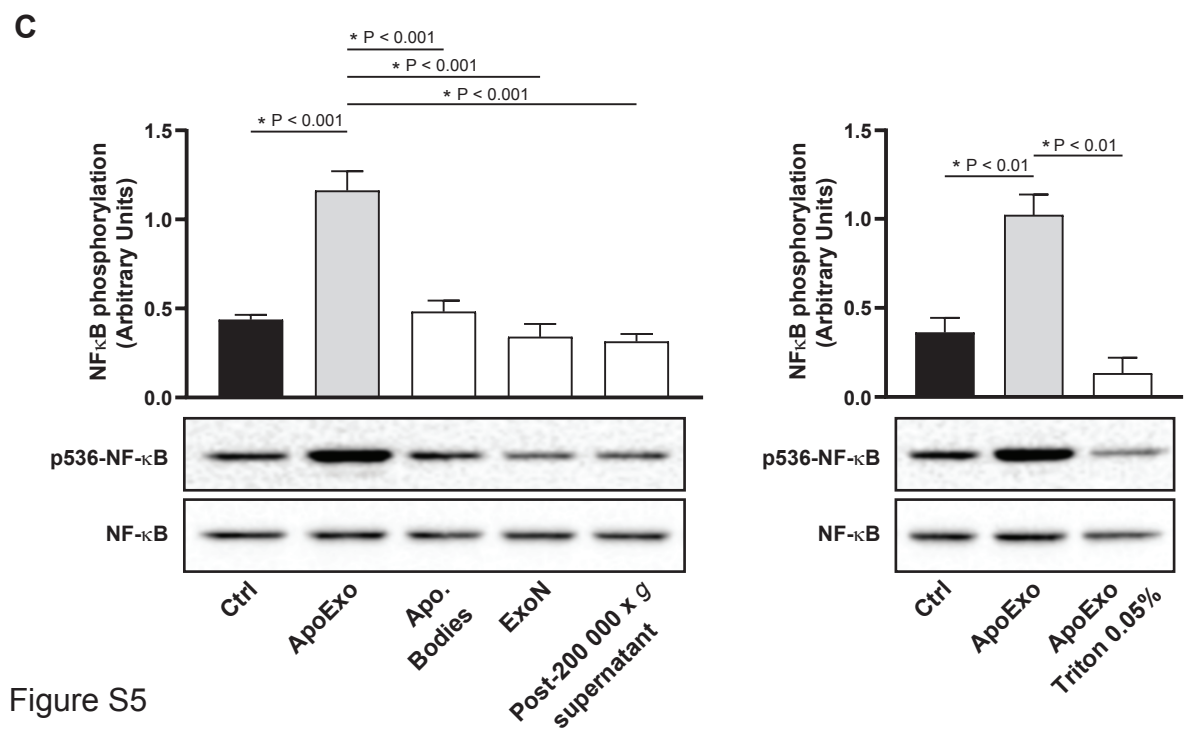

Figure S5

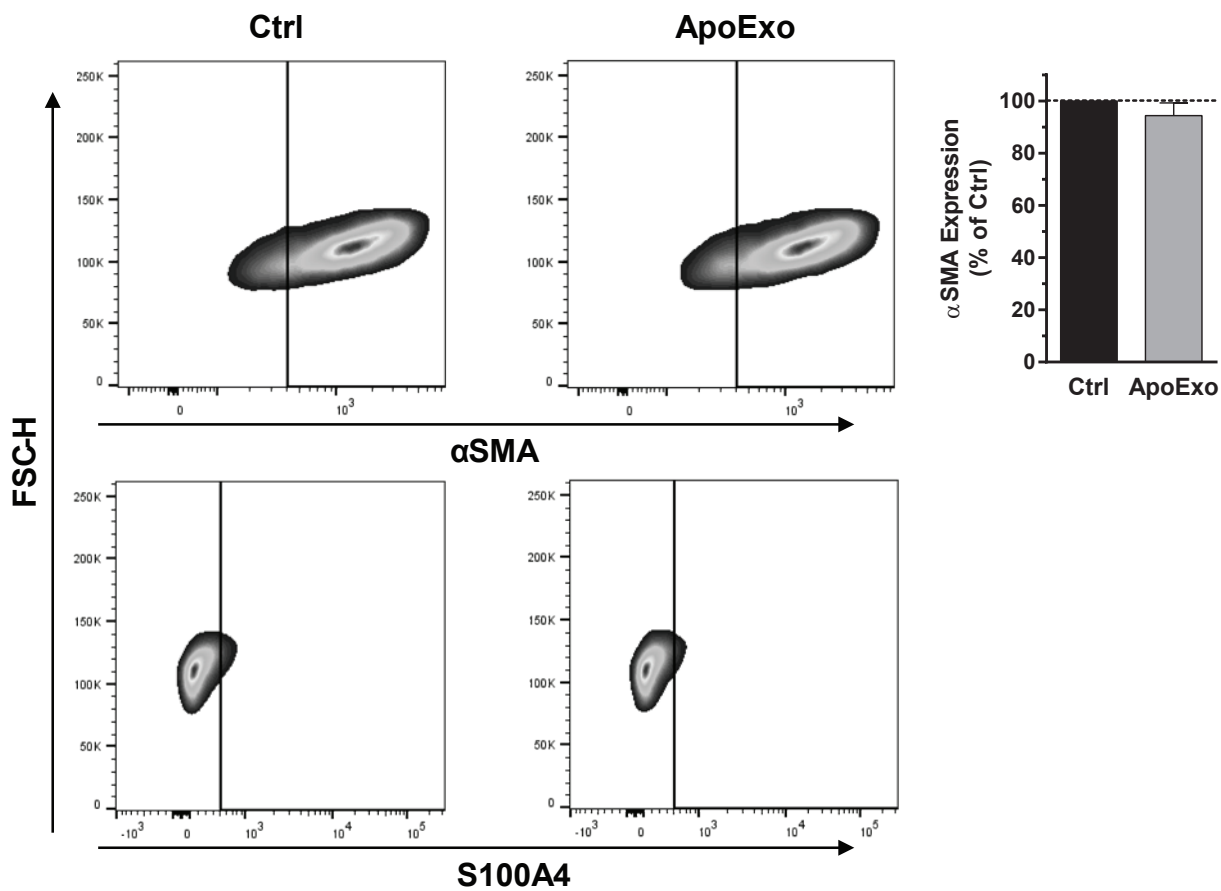

Figure S6

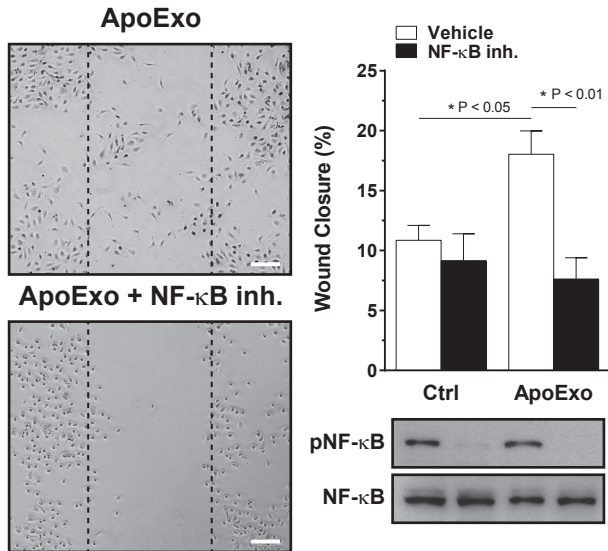

Figure S7

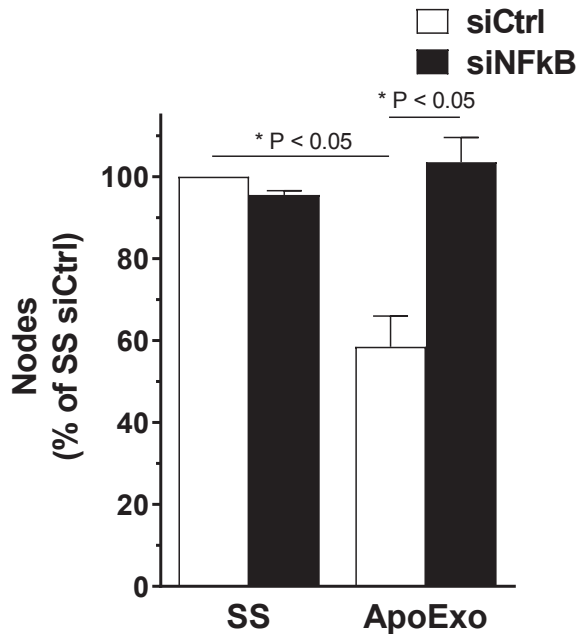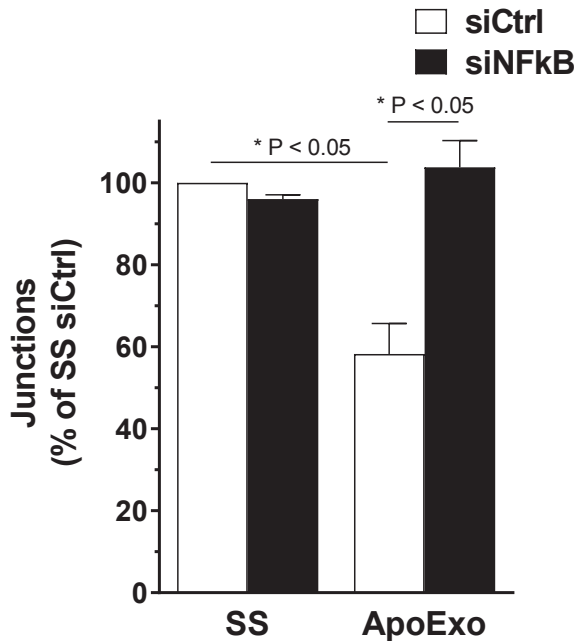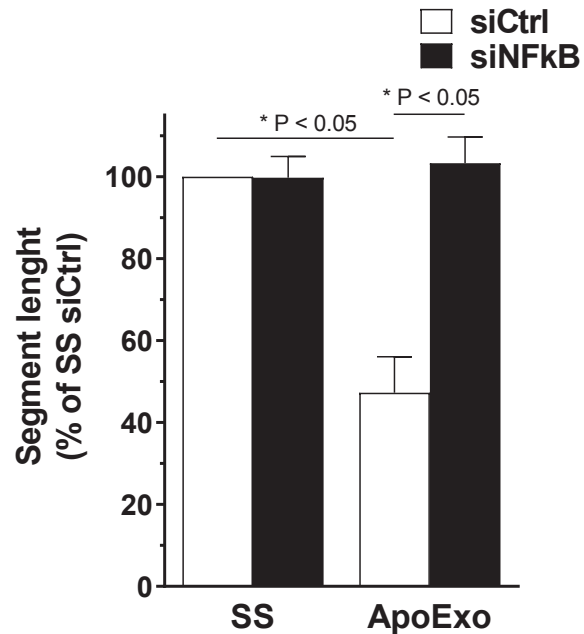

Figure S8

## RNA-sequencing

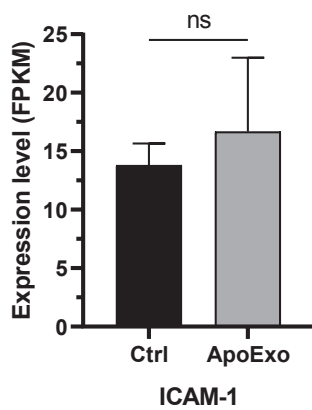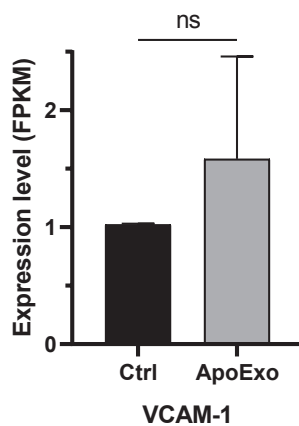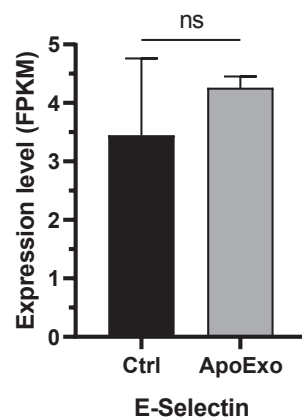

## qRT-PCR

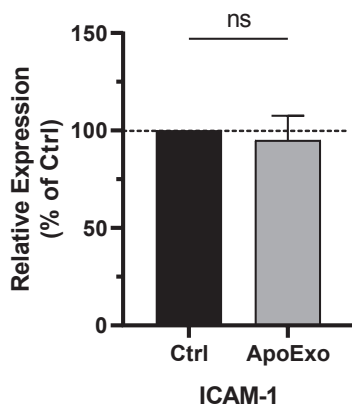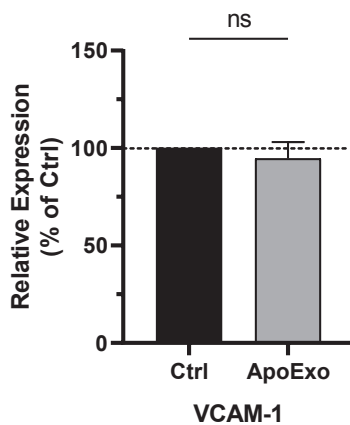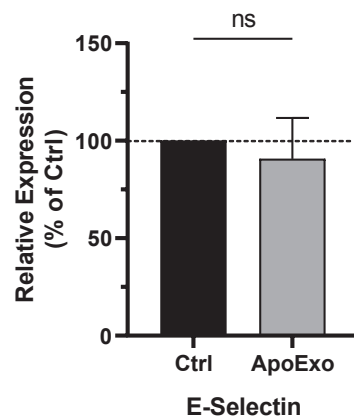

Figure S9

**A**

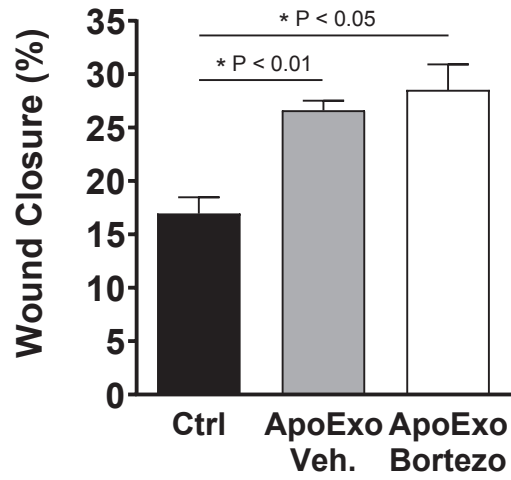

**B**

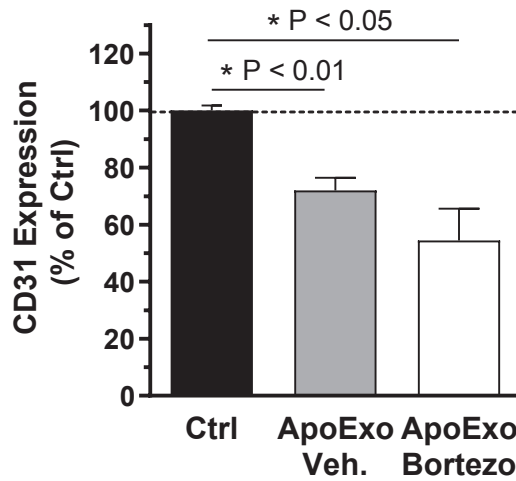

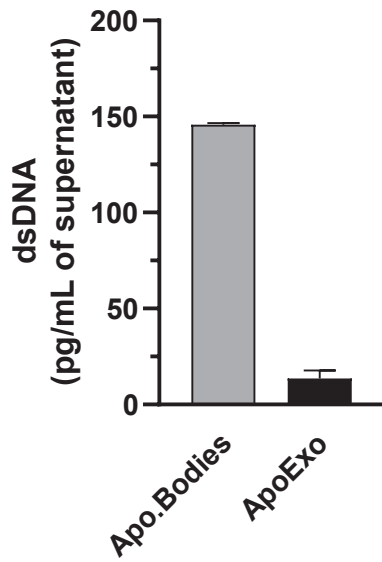

Figure S11



Fig. 4B

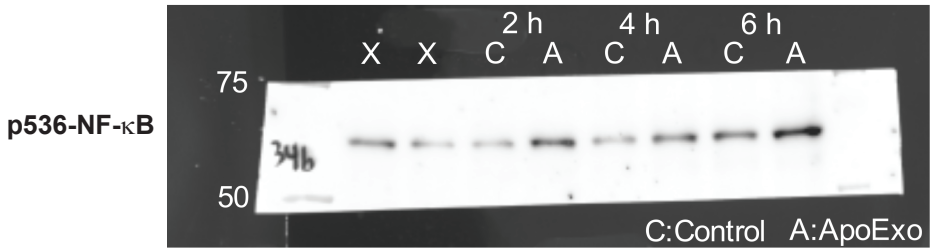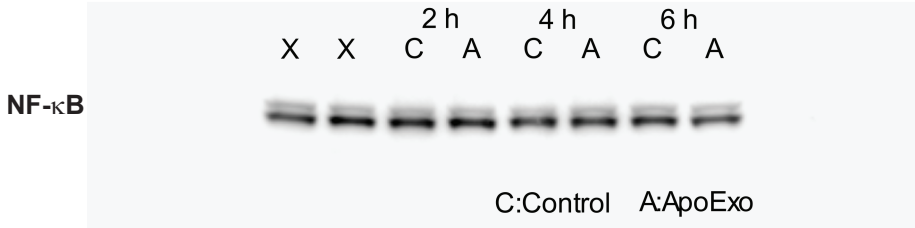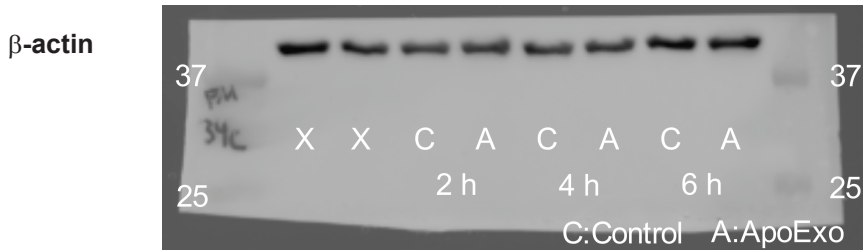

Fig. 4C

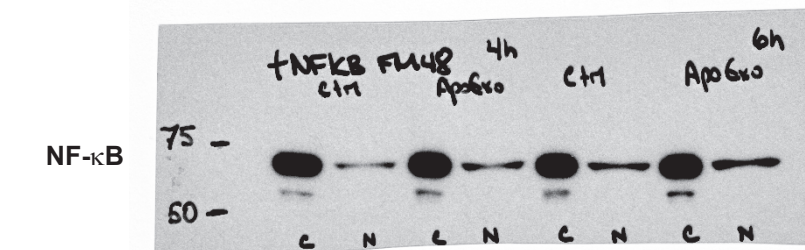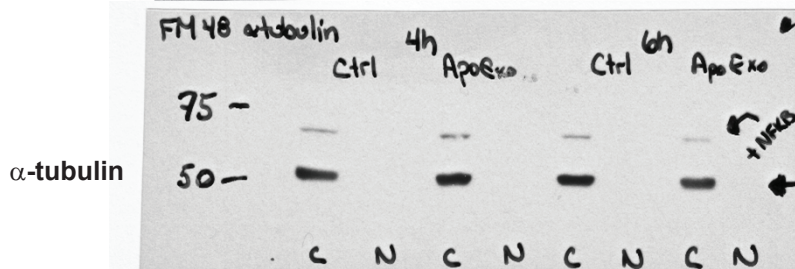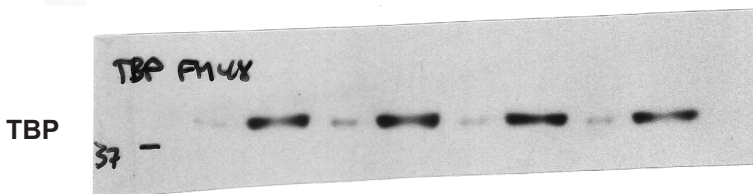

Figure S12

Fig. 5A

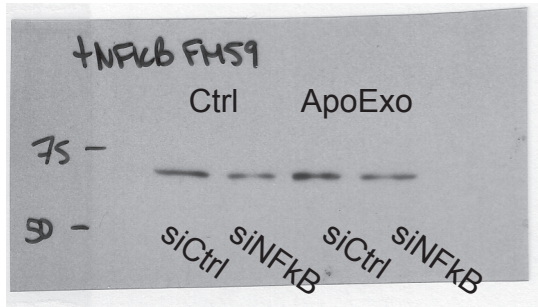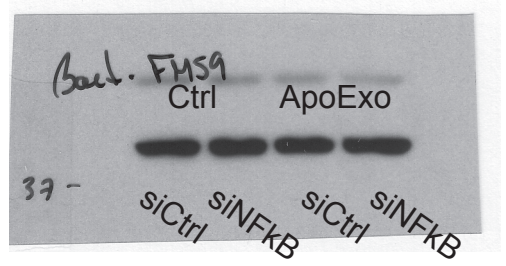

Fig. 5B

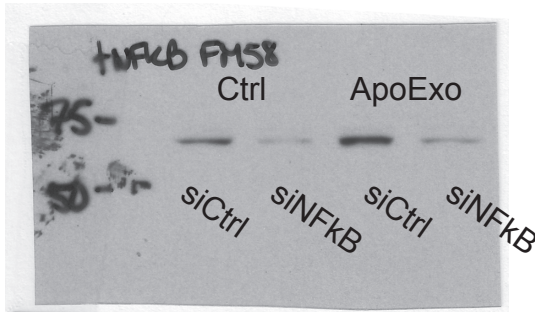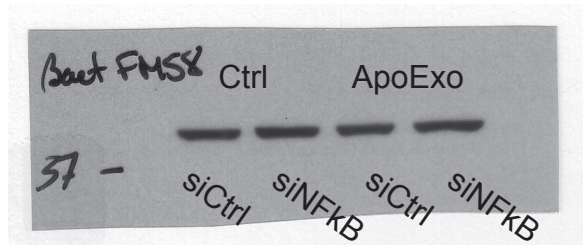

Fig. 5C

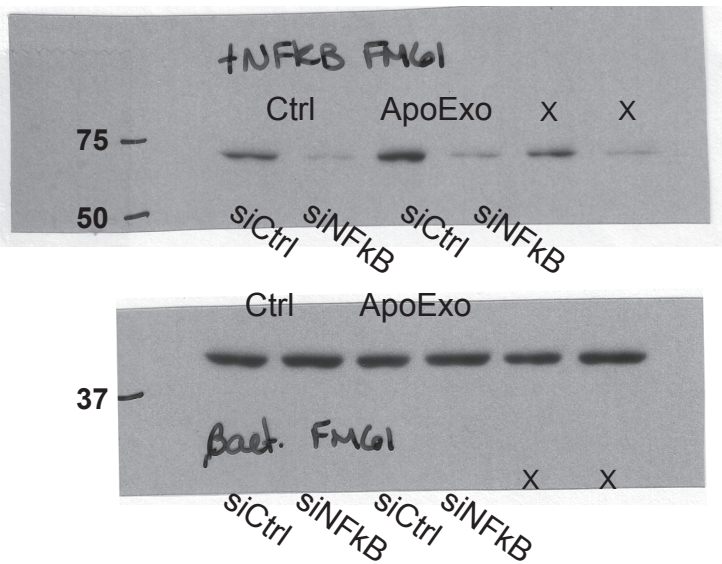

Fig. 5D

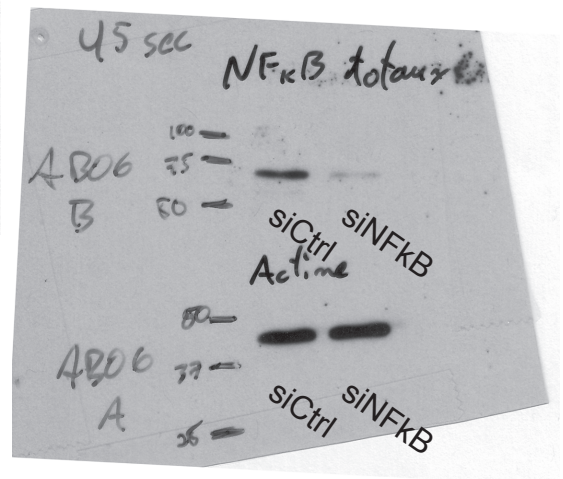

Figure S13

Cleaved caspase-3

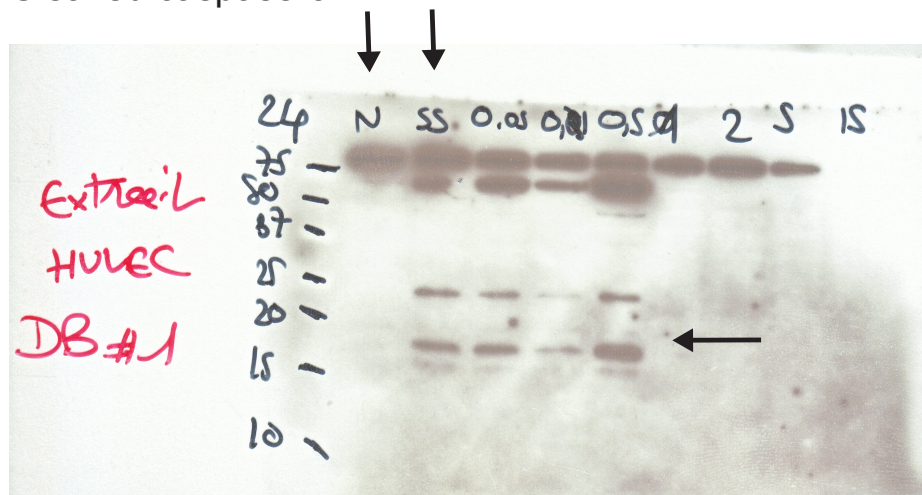

B-actin

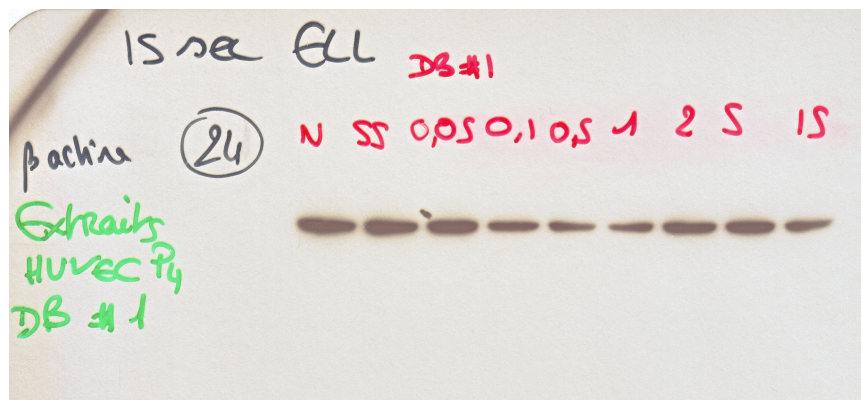

Figure S14

### GM130

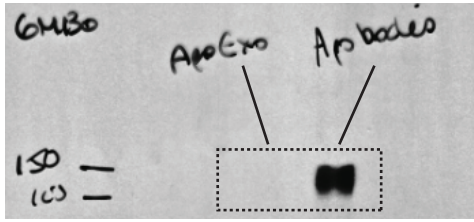

### Syntenin

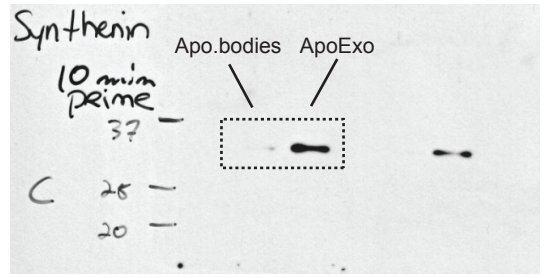

### LAMP2

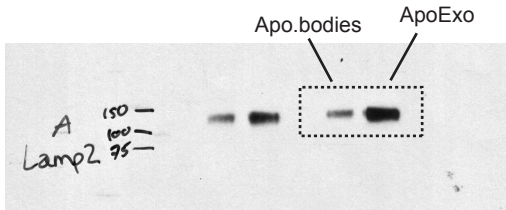

### 20S Proteasome $\alpha$ 3

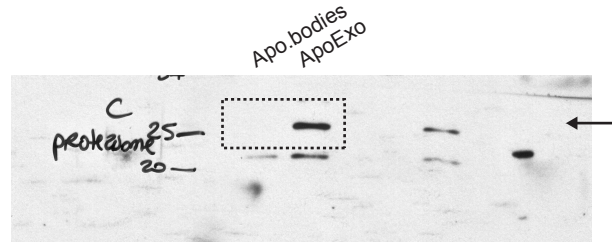

### CD63

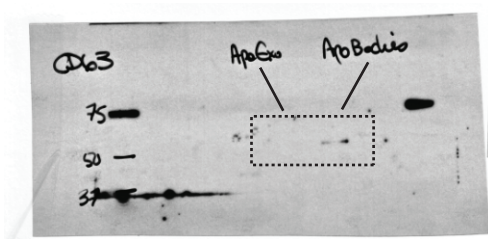

### LG3

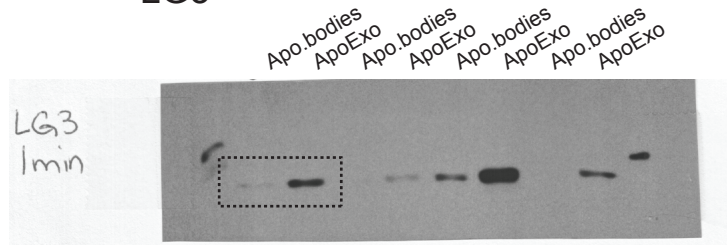

### Tubulin

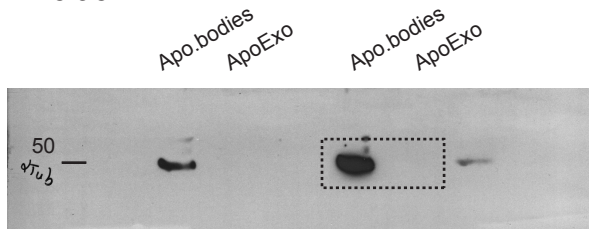

### TCTP

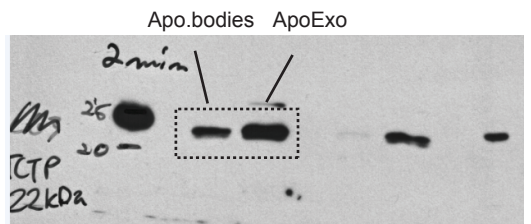

# p536-NF-κB

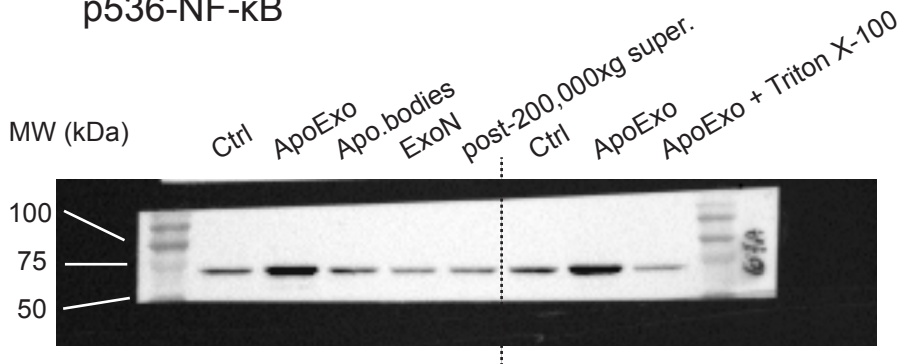

# NF-κB

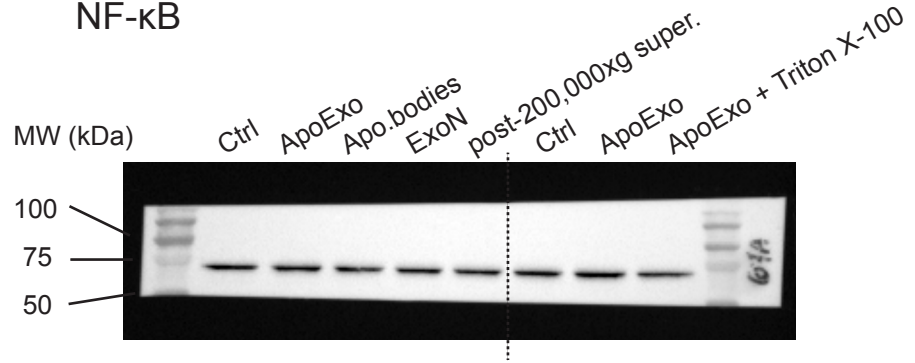

Figure S16
